# Supplementary material
Source: PubMed Central journal article supplement (PMC9530969)
Supplement: NIHMS1839856-supplement-Supplementary.pdf [file NIHMS1839856-supplement-Supplementary.pdf]

# Molecular Dynamics Simulations of Protein RNA Complexes by Using an Advanced Electrostatic Model

Zhifeng Jing and Pengyu Ren\*

Department of Biomedical Engineering, The University of Texas at Austin, Austin, TX 78712

\* Corresponding author. Email: [pren@mail.utexas.edu](mailto:pren@mail.utexas.edu)

### **Simulations of RNA and DNA systems**

The optimized parameters were tested on several RNA and DNA systems following the procedure in our previous work.<sup>1</sup> Three 1000-ns simulations were performed for tetranucleotides AAAA and GACC. Two 500-ns simulations were performed for 2JXQ, 2KOC and 1NAJ. The AAAA simulations had slightly lower percentage of A-form conformation compared to the simulations with the original AMOEBA parameters, while the GACC system had slightly higher percentage of A-form. Simulations of an RNA duplex, an RNA hairpin and a DNA duplex resulted in slightly higher RMSDs to the crystal structure than simulations with the original parameters.

Table S1. Numbers of model dimer structures for protein-nucleic acid interactions with PDB

| geometry  | A  | T  | U  | G  | C  |
|-----------|----|----|----|----|----|
| A         | 15 |    |    |    |    |
| T         | 14 | 10 |    |    |    |
| U         | 29 | 2  | 15 |    |    |
| G         | 35 | 19 | 34 | 25 |    |
| C         | 25 | 15 | 25 | 21 | 16 |
| NMA       | 19 | 17 | 17 | 16 | 19 |
| EtOH      | 7  | 8  | 9  | 9  | 9  |
| Acetate   | 10 | 12 | 11 | 11 | 12 |
| MeNH3     | 6  | 4  | 4  | 5  | 4  |
| Imidazole | 14 | 12 | 12 | 14 | 12 |
| Benzene   | 16 | 17 | 17 | 18 | 16 |

Table S2. Root mean squared deviations ( $\text{\AA}$ ) of DNA and RNA systems in AMOEBA simulations.

| Type         | PDB  | RMSD(amoebabio18) |            | RMSD(this work) |            |
|--------------|------|-------------------|------------|-----------------|------------|
|              |      | Non-terminal      | Heavy-atom | Non-terminal    | Heavy-atom |
| RNA duplex   | 2JXQ | 1.25              | 1.98       | 1.588           | 2.598      |
|              |      | 1.41              | 2.38       | 1.416           | 2.385      |
| RNA hairpin  | 2KOC | 1.72              | 1.78       | 1.93            | 1.983      |
|              |      | 1.9               | 1.95       | 1.901           | 1.977      |
| B-DNA duplex | 1NAJ | 1.29              | 2.54       | 1.439           | 2.17       |
|              |      |                   |            | 1.532           | 2.343      |

For each system, the results of two independent simulations are listed.

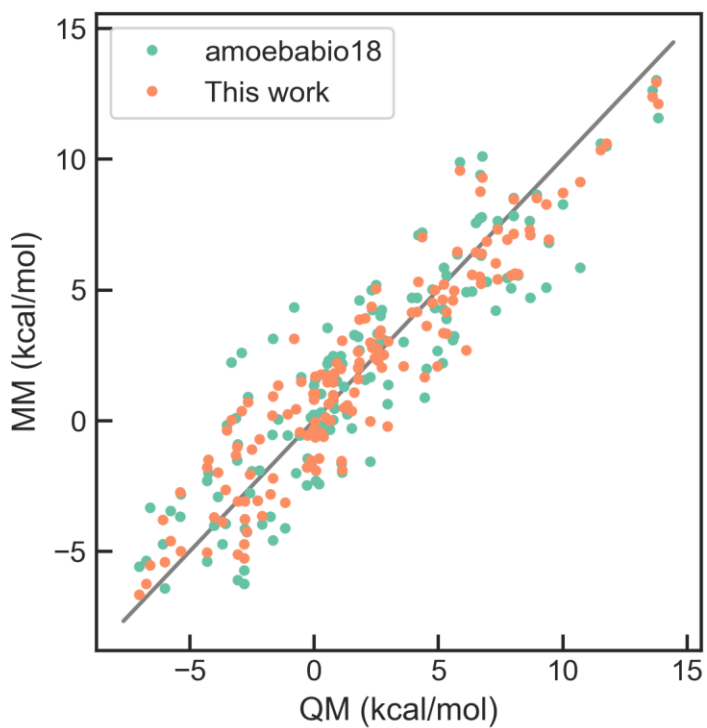

Figure S1. Correlation between QM and MM relative energies for the Asn conformers generated from one-dimensional torsion scan and rotamer library.

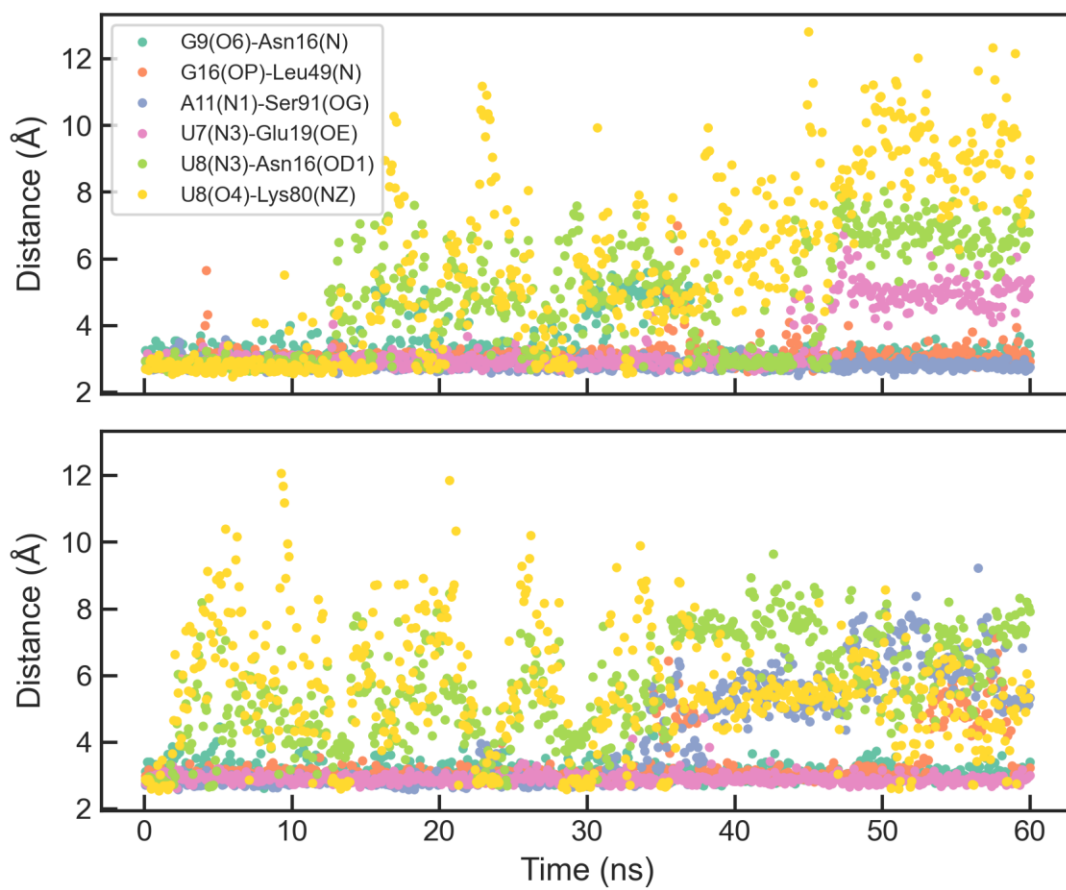

Figure S2. Evolution of selected hydrogen-bond distances in simulations of U1A with optimized vdW parameters.

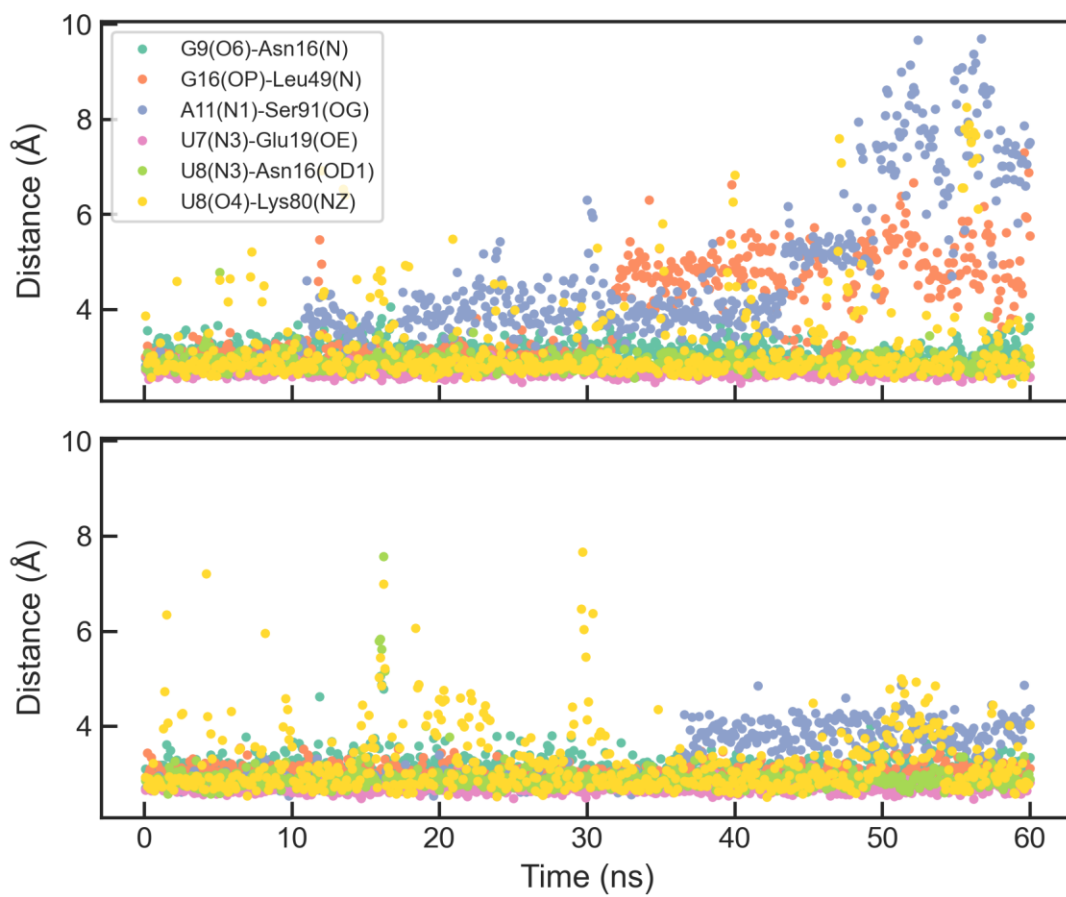

Figure S3. Evolution of selected hydrogen-bond distances in simulations of U1A with optimized vdW and Asn side-chain torsion parameters.

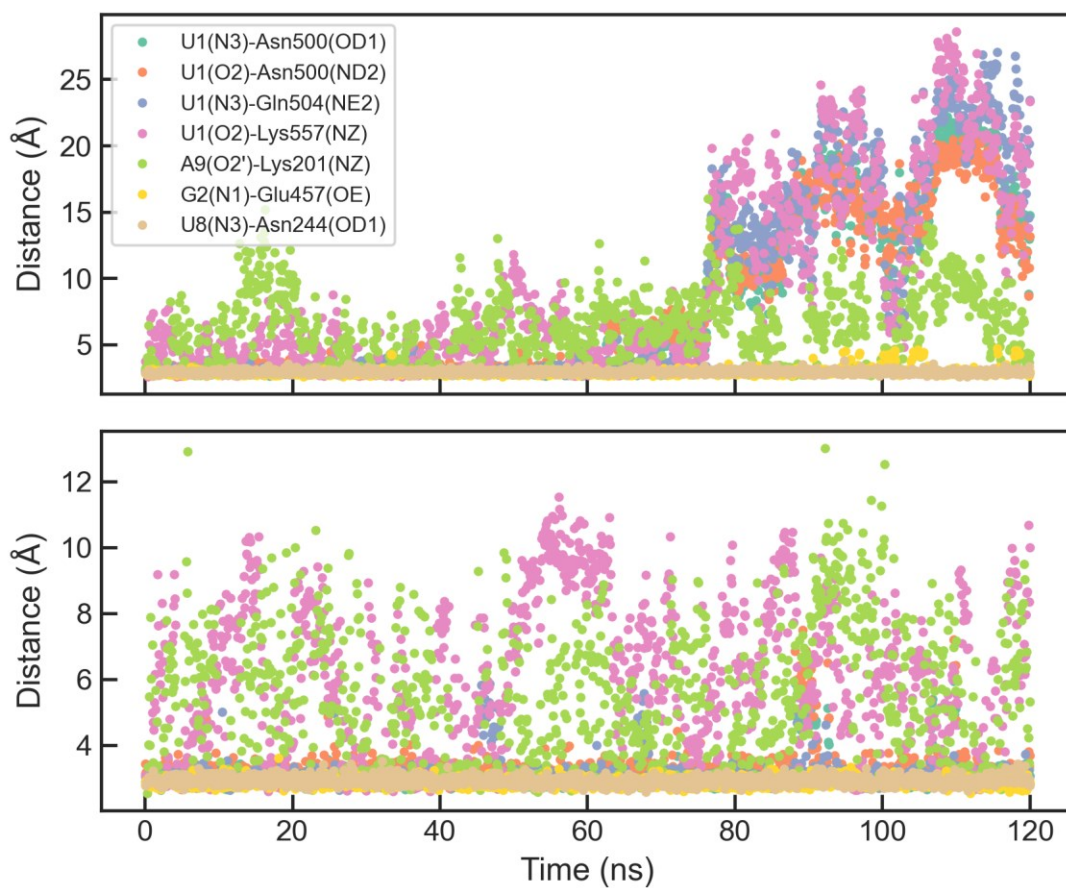

Figure S4. Evolution of selected hydrogen-bond distances in simulations of FBF with original AMOEBA parameters.

## References

- (1) Zhang, C.; Lu, C.; Jing, Z.; Wu, C.; Piquemal, J.-P.; Ponder, J. W.; Ren, P. AMOEBA Polarizable Atomic Multipole Force Field for Nucleic Acids. *J. Chem. Theory Comput.* **2018**, *14* (4), 2084-2108. DOI: 10.1021/acs.jctc.7b01169.
